# Supplementary material for: Impaired visual, working, and verbal memory in first-episode, drug-naive patients with major depressive disorder in a Chinese population
Source: PLoS One. 2018 Apr 23;13(4):e0196023. doi: 10.1371/journal.pone.0196023 (PMC5912727; doi:10.1371/journal.pone.0196023)
Supplement: S1 Table — (XLSX) [file pone.0196023.s001.xlsx]

## Sheet: data
Group: 1: untreated; 2: treating; 3: normal	Sex: 1: Female; 2: male	Age	Education	Z-DET	Z-IDN	Z-OCL	Z-TWOB	Z-GML	Z-ISL	Z-SEC	Z-CPAL	Composite	QOL	SASS	CWRT	HAMD	HAMA	MADRS	Test time（min）
1	2	19	16	0.133648	-0.003897		-0.331548	-0.65218	-1.26958	-1.54235	-0.614176	-0.611441	58	28	98	23	21	31	43
1	2	24	12		0.279089	-0.609184	-1.25875	-0.887832	-1.54745	-0.620827	1.54449	-0.442924	66	30	86	21	24	37	72
1	2	43	12	-1.18422	-1.88616	-1.03845	-2.09008	1.63701	-2.65894	-1.71768	1.83969	-0.887352	88	28	84	22	17	31	68
1	2	44	12	-0.603612	-0.038029	-1.20616	-3.22634		-0.991712	-1.52527	1.35999	-0.890162	63	27	100	22	17	36	57
1	1	21	16	0.692632	0.765346	-1.44535	-0.808823	-0.483857	-0.43597	-0.122707	0.27143	-0.195912	48	12	100	24	29	32	50
1	2	20	16	0.737313	1.62815	-0.647445	-1.32805	0.223099	-2.93681	0.142878	0.492831	-0.211003	74	33	100	21	18	25	47
1	1	18	12	-0.968255	-0.919869	-1.80712	-0.562892	-0.450192	0.119772	0.339498	-0.909378	-0.644805	86	31	98	8	7	7	45
1	1	38	15	0.672112	0.925756	-0.757816	-1.12079	-0.65218	-0.713841	0.697977	-0.134473	-0.135407	59	23	100	21	19	34	44
1	1	33	16	0.065738	-0.691234	-2.23978	-1.51939	-0.685845	0.953385	0.828876	0.142279	-0.393247	60	20	88	20	15	36	45
1	1	29	16	-0.479238	-1.30676	-1.40889	-3.20216	1.23304	-1.26958	0.446545	0.36368	-0.702922	82	28	96	23	22	23	50
1	1	29	15	0.818832	2.12586	-2.58849	-2.79441		-5.99339	-2.09006		-1.75361	60	26	88	28	29	43	56
1	2	22	16	-0.340119	-0.315819	-0.383761	-0.331548	0.52608	-0.713841	-0.543777	1.17549	-0.115912	66	33	98	16	13	21	46
1	1	20	12	-1.41826	-0.749312	-3.85671	-3.41347	-0.046217	0.953385	0.687526	-0.023772	-0.983354	70	34	100	26	25	33	54
1	1	44	16	0.034903	-0.818556	-2.18517	-2.287	1.80533	-1.82533	-0.018406	0.455931	-0.604785	52	20	96	25	22	28	47
1	1	45	9	-0.086786	2.51708	-3.60072	-3.51464	0.997385	-2.1032	-2.00696		-1.11398	74	29	96	26	26	30	67
1	1	32	12	-0.223936	0.389235	-1.86098	0.657825	0.15577	-1.26958	0.159467	-0.318974	-0.288897	53	18	94	27	21	32	49
1	1	25	15	-0.428343	-0.119537	-0.151475	-1.42781	0.290428	-1.54745	-0.037203	-0.282074	-0.462934	78	21	76	19	18	36	48
1	1	26	16	-0.191913	0.882404	-0.370871	0.906563	0.391422	-0.713841	-0.205808	-1.22303	-0.065634	64	32	94	21	21	16	54
1	1	28	9	-0.772361	2.02886	-0.936769	-0.997361	0.256764	-1.26958	0.339498	0.585082	-0.095735	67	22	90	24	17	35	50
1	1	26	16	0.72046	-0.713542	-0.040602	-1.64512	-0.147211	0.119772	0.994758	-0.263624	-0.121888	71	28	98	18	19	32	55
1	2	32	16	-0.943939	-2.52332	0.297784	0.257183	-1.08982	-1.26958	0.254145	-1.46288	-0.810054	72	29	100	19	16	22	47
1	1	38	16	0.068777	0.422993	0.219637	-0.766162	0.425087	-4.04829	0.561635	0.197629	-0.364837	75	24	96	10	7	11	64
1	2	40	9	0.531781	-0.656277	-1.28315	-2.28302	0.357757	-2.93681	-1.71768	1.59984	-0.798446	53	27	90	24	23	36	56
1	2	19	12	0.573553	-0.231901	-0.151475	-0.063145	0.357757	-2.65894	0.561635	0.640432	-0.12151	51	20	86	24	19	37	48
1	1	30	9		2.17642	-1.35062	-1.65905	0.357757	-0.713841	-0.443944	0.086928	-0.220907	86	32	74	24	18	23	53
1	2	32	19	2.34747	1.72664	0.529123	0.444708	1.3677	0.119772	0.687526	-1.18613	0.754601	65	25	98	20	19	27	45
1	2	27	19	-0.788668	-1.04162	-1.13086	-0.063145	0.59341	-3.21468	0.687526	-0.189823	-0.643483	46	22	96	27	22	34	43
1	2	42	9		1.72767	-0.112954	0.444708	0.59341	-2.65894	-2.02794	1.85814	-0.025128	73	30	88	27	25	36	67
1	2	28	9	0.948109	1.79724	-1.49527	-1.70359	-0.046217	-3.77042	-0.205808	2.04264	-0.304164	54	29	70	25	14	27	61
1	1	34	12	-0.053465	-1.11553	-2.1793	-1.4689	-0.21454	0.397643	-0.122707	-0.208273	-0.620634							48
1	2	35	9	2.1082	1.09397	-1.84718	-0.331548	-0.21454	-1.54745	-1.92591	-0.577276	-0.405219							52
1	1	29	16	-1.02058	1.56588	0.887075	-0.063145	-0.079882	-0.991712	1.71916	-0.927828	0.136122							44
1	2	44	9	0.69316	0.104224	0.887075	0.906563	0.256764	-1.26958	0.650237	0.123829	0.294034							58
1	1	45	9	1.79526	-0.410363	0.071181	-0.766162	0.256764	-2.38107		1.08323	-0.050164							54
1	1	24	15	-0.968013	-1.81873	-0.695187	0.657825	0.088441	-2.38107	-0.037203	0.437481	-0.589557							45
1	2	21	9	-0.054975	0.134591	-1.90973	-1.53587	0.492416	-4.04829	-2.35565	2.39319	-0.860539							46
2	1	36	16	0.22329	1.45931	-0.587629	2.63676	-0.349199	-0.158099	-0.520461	0.880284	0.448032							51
2	1	34	9	0.797511	0.190129	-1.86098	-0.451203	1.2667	-1.82533	-0.286855	0.843383	-0.16583							53
2	1	37	13	1.0842	0.317618	0.412808	0.257183	0.930055	-1.82533	-2.00696	1.06479	0.029296							49
2	1	28	16	0.649169	0.711872	1.00989	0.906563	-0.046217	0.953385	1.00199	-0.337424	0.606154							44
2	1	26	16	-1.03759	0.561662	0.332544	0.123436	-0.416528	-0.43597	0.83783	1.35999	0.165672							47
2	1	19	13	1.54828	1.47877	-0.863479	-0.753351	0.52608	-3.49255	0.23869	-0.614176	-0.241468							48
2	2	24	16	0.12025	0.149807	-1.43861	0.444708	-0.719509	-1.26958	0.051147	-0.171373	-0.354145							56
2	2	26	16	1.25277	1.37534	-0.040602	0.657825	1.09838	-2.38107	0.687526	-0.374325	0.284481							52
2	1	28	12	0.258338	1.51357	1.26177	0.257183	1.2667	-0.43597	-0.122707	0.123829	0.51534							47
2	2	41	12	-0.629905	-0.377288	-1.63891	-2.23438	1.13204	-3.21468	-1.61687	3.3157	-0.658037							52
2	1	30	15	0.734492	1.81765	-2.22482	-1.41133	2.64695	0.119772	-0.037203	1.06479	0.338787							61
2	2	26	12	-0.422092	-0.180915	-2.43656	-2.32244	2.54596	-2.38107	-0.286855	1.23084	-0.531642							51
2	2	47	9	-0.5328	1.59723	-1.39105	0.657825	-0.079882	-2.38107	-0.342992	-0.060673	-0.316676							58
2	2	24	12	2.11217	0.076037	-2.41495	-3.28722	2.64695	-1.54745	-2.02794	1.10169	-0.417591	60	36	92	29	22	33	52
2	1	22	16	0.132455	0.0148	-1.54415	-1.99619	2.54596	-1.54745	-2.12334	1.67364	-0.355535	56	18	94	24	22	34	41
2	1	36	9		0.790001	-1.44535	-3.1816	1.16571	-1.82533	-0.286855	0.972534	-0.544412	56	25	74	21	18	29	60
2	1	25	16	-0.859256	-1.06174	-2.60875	-3.13494	3.05092	-0.43597	0.446545	-1.29683	-0.737501	71	31	98	10	12	15	48
2	1	23	19	-1.3162	-2.06943	0.412808	0.657825	0.425087	2.06487	0.828876	-1.46288	-0.057381							46
2	1	30	16	-0.060294	0.518259	0.646849	-3.72312	2.17564	-1.54745	0.561635	-0.152923	-0.197675	71	33	100	27	24	31	59
2	2	23	12	-0.457731	-0.994529	0.797208	-1.39892	1.93999	-1.26958	0.23869	1.17549	0.003826	61	25	96	18	14	26	47
2	1	42	9	-0.693166	0.34128	-0.112954	0.444708	0.829062	-2.93681	-2.00696	1.65519	-0.309957	76	31	84	11	9	14	52
2	1	45	12	-0.727662	0.74496	-1.75528	-1.29871	1.2667	-1.54745	-0.286855	0.824933	-0.347421							50
2	2	27	19	-1.05448	-1.6911	1.00989	2.63676	-0.988826	0.953385	0.828876	-1.29683	0.049709							43
2	1	44	16	-0.554214	-0.286497	1.79722	-0.451203	0.997385	-1.82533	0.23869	1.54449	0.182568							62
2	2	41	15	-0.884157	-0.18392	-1.12145	0.657825	-0.65218	-2.1032	0.339498	-1.31528	-0.657858							48
2	1	34	9	0.795665	0.832734	-0.609184	-1.2692	0.96372	-1.54745	0.23869	-0.005322	-0.075045	59	23	70	28	24	38	57
2	1	21	15	-0.674697	-1.51084	-0.567478	-0.202721	1.70434	0.119772	0.687526	2.06109	0.202124	79	19	92	5	6	7	38
2	2	43	9	1.06068	1.16497	-1.35457	-2.2385	1.23304	-1.26958	-2.1292	-0.485025	-0.502275	64	31	96	21	15	29	62
2	1	19	12	-0.221966	-0.202114	-1.28889	-0.8592	1.40136	0.119772	-0.037203	1.71054	0.077787	55	27	98	17	22	25	51
2	2	26	16	-0.214552	2.99086	-2.00926	-2.35414		-2.38107	-0.573997	3.2788	-0.180479	50	39	100	20	17	33	68
2	1	29	16	-0.490816	-0.14579	-0.358761	-1.18631	-0.753174	-0.991712	0.687526	1.12014	-0.264863	65	24	98	24	23	34	38
2	1	38	16	0.422272	-1.30644	-0.242864	-0.331548	-0.921497	-0.713841	0.051147	-0.374325	-0.427137	46	25	100	14	18	25	45
2	1	40	15	0.330611	1.6626	-1.13988	-1.77787	0.52608	-0.991712	0.446545	0.400581	-0.067881	65	23	98	11	9	11	41
2	1	23	16	-0.176235	0.084096	-4.04103	-3.3962	1.06471	-0.991712	-2.00696	0.160729	-1.16282	62	28	96	24	26	32	43
2	1	31	16	-1.13543	1.1073	-0.695187	0.657825	0.59341	-0.991712	0.353788	0.197629	0.010952	83	28	84	4	4	2	65
2	2	23	16	0.216212	1.23974	-0.908993	0.257183	0.795397	-0.713841	0.994758	1.10169	0.372768	64	28	96	24	17	33	80
2	1	23	15	0.500871	-0.530438	-1.17857	-1.63914	0.795397	-0.713841	1.20867	1.15704	-0.050002	59	21	94	9	6	5	49
2	1	45	15	0.465822	0.056759	-0.695187	-1.07502	1.33403	-0.43597	-2.17557	1.37844	-0.143337	70	25	100	5	7	5	50
2	1	44	15	0.711996	0.758847	0.766117	-0.331548	0.930055	-0.991712	-2.00696	0.695782	0.066572	69	23	100	2	1	2	53
2	1	28	12	-0.310246	-0.520547	-0.040602	-0.451203	1.839	-1.26958	-0.286855	0.27143	-0.096076	64	21	100	11	12	16	45
2	1	28	15	-0.616792	-0.300216	-0.695187	-1.98785	1.80533	-3.21468	0.446545	0.105379	-0.557183	86	41	88				44
2	1	38	16	-0.083853	-0.366688	-1.41146	-1.03091		-0.991712	-1.84662	1.28619	-0.635009	67	36	100	26	24	33	60
2	2	29	12	-0.423558	-0.149646	-0.834802	-2.61478	0.761732	-2.93681	-0.122707	-0.835578	-0.894519	63	28	94	22	19	27	53
2	2	32	16	-1.12799	-0.215692	-1.18663	-0.063145	0.088441	-3.49255	-0.520461	0.179179	-0.792356			84	15	15	19	45
2	2	38	12	0.959891	-0.659797	0.071181	-0.331548	1.43502	-3.49255	-0.037203	1.23084	-0.103021	42	14	98	18	15	30	54
2	2	27	19	0.254517	0.026792	-0.040602	-1.29238	4.4985	-4.60404	-0.520461	-0.669527	-0.2934	68	29	100	21	18	21	69
2	1	31	15	0.156374	1.29297	-0.695187	-0.202721	0.458751	-1.54745	0.561635	0.34523	0.0462	76	32	98	3	4	4	51
2	1	28	16	2.35344	3.36749	-2.01451	-2.39153	0.15577	-1.26958	-1.46859	-0.318974	-0.198311	42	15	88	23	19	26	62
2	1	34	12	-0.563076	-0.325168	-1.28315	-1.25875	0.122105	-1.54745	-0.205808	-0.392775	-0.681759	61	22	88	23	27	34	61
2	1	18	12	0.235582	1.25561	0.529123	-0.331548	0.088441	-0.43597	0.339498	-0.964728	0.089501	62	26	96	2	3	4	41
2	1	25	12	0.103124	1.00094	-1.08418	-1.87967	1.60335	-2.38107	0.353788	-0.983179	-0.408361	47	28	100	18	26	28	48
2	1	23	16	-0.842701	-0.776584	-1.75528	-1.61258	-0.483857	0.675514	0.697977	-1.03853	-0.642005	70	27	98	24	22	24	42
2	1	27	15	0.699921	1.03087	-1.72993	-0.562892	0.829062	-2.93681	-0.286855	1.63674	-0.164986	78	41	90	3	4	4	51
2	1	32	16	3.25755	-0.631867	-0.151475	0.444708	0.189435	-0.158099	0.051147	-1.55513	0.180783	71	28	100	7	7	10	41
2	1	27	12	2.45087		-1.86098	-1.64512	1.2667	-2.38107	-0.36615	0.732683	-0.257581	76	30	80	16	19	26	58
2	1	25	15	-1.00496	-1.23637	-0.040602	-0.766162	-0.248205	1.50913	-0.65186	-0.116023	-0.319382			100	16	8	21	54
2	2	43	12	2.21416	0.335258	-0.370871	-0.331548	0.559745	-3.49255	0.446545	1.24929	0.076253							47
2	2	34	12	-0.290261	2.62828	0.646849	-1.42781	4.56583	-0.713841	-1.8094	-0.669527	0.366264							54
2	2	33	16	0.525716	0.884506	-1.39434	-0.331548	-0.416528	-2.1032	0.561635	-0.226724	-0.31256							50
2	2	19	12	-0.088843	-0.014806	-2.01451	-1.67171	0.189435	-1.82533	0.994758	0.197629	-0.529171							46
2	1	41	16	-0.026116	-0.00342	0.646849	-0.647183	-0.854167	-1.82533	0.536877	0.031578	-0.267613							56
2	2	24	16	-0.957268	-0.193101	-1.54415	-4.2031	0.52608	-0.158099	0.446545	-0.485025	-0.821015							42
2	2	26	9	0.975669	0.450833	-1.49198	-0.451203	-0.820503	-4.04829	0.446545	1.08323	-0.481962							50
2	1	23	16	0.349086	-0.623228	0.646849	0.657825	-0.820503	0.397643	0.446545	-1.61048	-0.069533							54
2	1	47	16	2.43355	4.33724	-1.33302	-1.88182	0.357757	0.397643	-0.205808	-0.245174	0.482546							51
2	2	41	15	0.476654	1.25205	-2.18155	-1.76539	1.70434	-3.49255	-0.520461	2.20869	-0.289778							63
2	1	19	13	-0.984854	-1.2022	-1.54415	-0.063145	-0.28187	-0.158099	0.339498	-0.817127	-0.588993							44
2	1	35	15	1.36227	0.300429	-1.54415	-1.8289	0.122105	-0.991712	0.068847	1.04634	-0.183098							48
2	1	36	15	-0.11388	0.610507	-1.23437	-2.00147	3.52223	-2.38107	-2.09006	0.419031	-0.408635							60
2	2	33	12	0.421651	1.08204	-0.075185	0.444708	1.23304	-2.65894	-0.817332	-0.761777	-0.141475							56
2	2	24	12	-1.26327	-1.90719	-2.65214	-2.92623	1.97366	-3.21468	-2.28162	1.39689	-1.35932							42
3	1	24	16	-0.488411	-1.32541	1.93947	1.61789	-0.248205	-0.43597	0.687526		0.249556	79	36	98				39
3	1	29	16	0.622671	0.15227	0.529123	0.906563	-0.483857	0.119772	0.142878		0.284203	87	35	98				42
3	2	30	15	-0.251496		0.071181	0.257183	-0.315534	-0.158099	0.446545	-0.355874	-0.043728	83	29	92				39
3	1	39	19	1.88571	0.943692	-1.67315	-1.11047	-0.28187	-1.54745	0.828876	0.695782	-0.03236	78	36	100				39
3	1	23	19	-0.583446	-0.714174	-0.807917	0.444708	-0.28187	0.119772	0.23869	-0.854028	-0.304783	102	43	100				43
3	1	22	15	-0.234121	-0.57985	-0.919969	-1.42025	-0.517522	0.397643		0.898734	-0.339333	91	34	96				39
3	1	22	15	0.278926	-0.777048	-0.441272	0.089225	1.2667	-0.43597	0.145282	0.880284	0.125766	92	38	96				39
3	1	27	15	0.16595	-0.448273	-0.152524	-1.45817	2.78161	0.119772	-0.037203	-0.854028	0.014642	77	29	86				45
3	2	41	16	0.050619	-0.388764	0.412808	0.444708	-0.113547	0.119772	-1.52028	-0.706427	-0.212639	97	32	100				44
3	2	45	12	-0.3597	-0.595581	-1.38761	-1.18631	1.33403	0.397643		2.63305	0.11936	82	30	100				35
3	2	24	9		-0.40456	1.0045	0.657825	-0.315534	0.119772	-0.342992	0.566632	0.183664	69	25	88				43
3	1	40	12	1.99889	1.52439	0.069946	0.657825	-0.584851	-0.158099	-0.890007	0.621982	0.40501	89	36	94				47
3	2	24	15	-0.961308	-0.099111	-1.09409	-0.667611	-0.551186	0.397643	0.339498	0.714233	-0.240242	90	39	90				38
3	1	21	16	-0.845088	-1.21312	-0.003019	-0.562892	-0.382863	0.397643	0.994758		-0.230654	84	34	98				40
3	2	34	12	0.109158	1.9637	-0.903124	0.089225	0.324093	-0.991712	0.145282	-0.540376	0.02453	80	30	92				39
3	2	28	15	-0.00495	0.813108	-0.19189	0.444708	0.223099	0.397643	-1.35406	1.26774	0.199425	87	39	98				55
3	2	43	12	0.787531	-0.316232	1.26177	0.089225	-0.046217	0.953385	0.254145	1.10169	0.510662	70	28	98				45
3	2	22	9	2.75383	3.37266	-1.50154		1.23304	-0.713841	-0.205808	0.28988	0.746887	92	34	92				51
3	2	40	15		-0.230882	0.004002	-0.667611	0.15577	0.675514	-0.018406	-0.724877	-0.115213	87	32	96				45
3	1	31	16	-0.368704	-0.652963	0.033821	-0.947293	-0.416528	0.119772	-0.495084		-0.389568	114	41	98				38
3	2	33	15	-0.607489	-1.92649	0.780539	-1.66168	-0.046217	-0.991712	0.339498	1.48914	-0.328052	81	43	96				45
3	2	26	12	0.43068	0.829742	-0.509185	-0.766162	-0.416528	1.23126	0.446545	-0.448125	0.099778	78	40	96				44
3	1	25	12	2.45929	-1.34054	-1.12145	-0.766162	-0.248205		0.446545	-0.909378	-0.211415	81	42	94				43
3	2	33	12	-0.48137	-0.764682	-1.04732	-0.331548	0.15577	-0.43597	0.687526	-0.854028	-0.383952	91	30	84				57
3	1	19	12	3.76124	-0.31177	1.06788	0.906563		-0.158099	0.561635	-0.263624	0.794832	88	24	94				50
3	2	19	15	-1.05148	-0.224061	-1.12145	-0.063145	1.2667	-0.991712	0.339498		-0.263665	78	37	96				38
3	2	43	15	0.702618	0.783051	-0.447244	-0.202721	-0.450192	-1.26958	0.561635	-0.595726	-0.11477	90	38	100				55
3	2	38	15	0.990826	0.001789	-1.01737	0.089225	-0.483857	0.119772	0.994758	1.24929	0.243054	96	35	98				46
3	2	39	16	0.41241	1.36389	-0.157966	-1.18631	0.930055	-1.54745	-0.018406	0.917184	0.089175	102	40	100				53
3	1	28	16	0.641693	-0.407951	0.071181	1.61789	-0.618515	1.50913	1.00199	-0.521926	0.411686							49
3	2	28	16	-1.23057	-0.497556	1.26177	2.63676	0.256764	1.50913	-1.6923	1.08323	0.415904							40
3	2	30	19	-0.635044	-0.857175	1.65869	0.657825	-0.685845	1.787	1.71916	-0.835578	0.351129							45
3	2	31	12	-0.454934	-0.069196	0.887075	0.444708	-0.483857	0.953385	0.339498	-0.835578	0.097638							43
3	2	28	9	-0.772212	-0.525241	-1.01536	0.444708	0.829062		-2.09006	1.00943	-0.30281							48
3	2	26	9	0.223613	-0.650139	-0.479552	0.906563	-0.685845	-0.713841	-0.286855	-0.171373	-0.232179							42
3	2	23	9	-0.622509	0.295517	-0.438106	-1.24199	-0.113547	0.675514	0.142878	1.45224	0.018749							43
3	2	29	9	-0.87289	0.032143	-1.38761	-0.947293	0.189435	-2.1032	0.339498	0.658882	-0.511378							49
3	2	28	12	-0.865732	-1.58327	1.00989	-0.947293	-1.05615	0.397643	0.828876		-0.316578							35
3	2	26	9	0.862482	-0.260295	0.766117	1.21021	-1.22448	1.50913	0.994758	-1.25993	0.324749							39
3	2	32	9	-0.108138	0.024845	-0.040602	-0.451203	0.021112	-0.158099	0.828876	0.216079	0.041609							41
3	1	51	14	-0.61248	-0.804939	1.13472	0.906563	-0.988826	-0.991712	0.339498	-0.005322	-0.127812
3	1	55	14	-0.659572	-0.270546	0.183939	0.257183	0.795397	-0.713841	-0.122707	-0.392775	-0.115365
3	1	52	9	-0.390442	0.699029	-0.370871	-1.87481	2.8826		0.23869	0.806483	0.284383
3	1	56	6	0.061463	-0.487434	0.529123	-0.808823	0.189435	-0.43597	-2.26391	0.34523	-0.358861
3	1	46	12	0.420041	3.24224	-1.43861	-0.451203	2.00732	-1.54745	-1.68147	2.46699	0.377233
3	1	24	16	-0.978012	0.060331	-0.040602	1.21021	0.054776	0.953385	0.687526	-1.16768	0.097492							46
3	1	31	18	-0.059051	-0.452696	-0.261549	0.257183	0.223099	0.119772	0.459625	-0.208273	0.009764							38
3	1	26	16	-1.00323	-0.735127	0.332544	0.089225	-0.483857	0.119772	0.145282	-1.03853	-0.32174							46
3	1	22	16	0.344475	-0.175577	0.917256	0.906563	-1.32547	1.50913	0.561635	-1.20458	0.191679							36
3	1	24	16	-0.721833	-0.635555	1.13472	-0.202721	-1.25814	1.50913	-2.09006	-1.18613	-0.431324							39
3	1	28	18	0.07102	0.176873	1.65869	1.21021	-1.12348	0.397643	1.20867	-1.07543	0.315524							42
3	1	31	18	0.016639	0.691447	1.93947	1.61789	-1.22448	0.397643		-0.761777	0.382404							38
3	1	38	12	-0.554823	0.507904	-1.75528	-2.20182	2.9836	-1.82533	-2.06789	0.954084	-0.494945							49
3	1	22	16	-1.02689	-0.520805	1.13472	0.906563	-0.416528	1.23126	0.687526	-1.27838	0.089682							39
3	1	22	16	0.374515	0.061801	0.766117	1.21021	-1.02249	0.675514	0.994758		0.437203							45
3	1	21	16	-0.236246	1.15959	-1.88659	-1.51939	-1.19081	-1.54745	0.561635	-1.33373	-0.749126							35
3	1	33	16	-0.809865	0.573616	0.071181	-0.331548	-0.046217	-0.713841	0.446545	-1.09388	-0.238001							41
3	1	31	16	0.503816	0.925111	1.26177	0.257183	-1.32547	2.06487	0.687526	-0.687977	0.460854							40
3	1	42	12	-0.734597	1.04828	0.766117	0.444708	1.19937	-0.713841	-1.61687	-0.152923	0.03003							48
